# Supplementary material for: Assessment of Rapid MinION Nanopore DNA Virus Meta-Genomics Using Calves Experimentally Infected with Bovine Herpes Virus-1
Source: MDPI journal article supplement (doi:10.3390/v14091859), 2022-08-24
Supplement: s1 [file s1]

|                                                            | Source                                                           | Origin                                                                                 | Characteristics                                                                                    | Culture Medium | Reference |
|------------------------------------------------------------|------------------------------------------------------------------|----------------------------------------------------------------------------------------|----------------------------------------------------------------------------------------------------|----------------|-----------|
| <b>Bovine foetal lung cells</b>                            | AFBI, Veterinary Science Division, Stormont, Belfast, N. Ireland | Bovine foetal lungs                                                                    | Semi-continuous cells, 23 passages, negative for <i>Mycoplasma</i> spp. and BVDV                   | G-MEM 2%       | Negative  |
| <b>Bovine foetal lung cells infected with BoHV-1-1-1-1</b> | AFBI, Veterinary Science Division, Stormont, Belfast, N. Ireland | BoHV-1-1-1-1 strain 2011-415 wt isolated from the trachea of a calf with IBR diagnosis | 5 mL of a dilution 1:100 of BoHV-1-1-1-1 in G-MEM 2% (MOI=1) were used to infect foetal lung cells | G-MEM 2%       | Positive  |

**Table S1.** Details of bovine foetal cell lung cultures used for infection with BoHV-1.
