# Supplementary material for: Assessment of Rapid MinION Nanopore DNA Virus Meta-Genomics Using Calves Experimentally Infected with Bovine Herpes Virus-1
Source: Viruses. 2022 Aug 24;14(9):1859. doi: 10.3390/v14091859 (PMC9501177; doi:10.3390/v14091859)
Supplement: Supplementary file 1 [file viruses-14-01859-s001.zip]

Archive with 13 entries (13 files):
- Figure S1.pdf
- Figure S2.pdf
- Figure S3.pdf
- File S1.xlsx
- File S2.xlsx
- Table S1.pdf
- Table S2.xlsx
- Table S3.xlsx
- Table S4.xlsx
- Table S5.xlsx
- Table S6.xlsx
- Table S7.xlsx
- Table S8.xlsx
