# Supplementary material for: Assessment of Rapid MinION Nanopore DNA Virus Meta-Genomics Using Calves Experimentally Infected with Bovine Herpes Virus-1
Source: Viruses. 2022 Aug 24;14(9):1859. doi: 10.3390/v14091859 (PMC9501177; doi:10.3390/v14091859)
Supplement: Supplementary file 1 [file viruses-14-01859-s001.zip › File S1.xlsx]

## Sheet: File S1
Day of experimental challenge	Nasal swab-1 (undepleted) BoHV-1 Cq													Nasal swab-2 (depleted) BoHV-1 Cq	Nasal swab-2 (undepleted) BoHV-1 Cq		File S1. qPCR analysis of BoHV-1 in undepleted Roche Magnapure nucleic extracts from nasal swab-1 eluates, and comaparison of BoHV1 Cq values in nasal swab-1 Roche Magnapure extracts and undepleted nasal swab-2 Qiagen Ultrasense virus kit extracts.
	Calf BoHV1_1	Calf BoHV1_2	Calf BoHV1_3	Calf BoHV1_4	Calf BoHV1_5	Calf BoHV1_6	Calf PBS_1	Calf PBS_2	Calf PBS_3	Calf PBS_4	Calf PBS_5	Calf PBS_6		Calf BoHV1_1	Calf BoHV1_1
-1	UD	UD	UD	UD	UD	UD	UD	UD	UD	UD	UD	UD		UD	UD
0	UD	UD	UD	UD	UD	UD	UD	UD	UD	UD	UD	UD		UD	UD
1	29.355	36.61	36.42	27.7	35.115	32.65	UD	UD	UD	UD	UD	UD		23.0236	19.4341
2	26.855	22.49	25.71	29.94	22.015	27.225	UD	UD	UD	UD	UD	UD		19.9078	16.8817
3	29.94	24.71	23.175	24.885	22.965	22.495	UD	UD	UD	UD	UD	UD		22.6517	17.8341
4	25.445	26.12	25.295	24.815	26.04	23.985	UD	UD	UD	UD	UD	UD		23.9027	19.4014
5	24.755	24.355	24.22	23.99	24.98	23.805	UD	UD	UD	UD	UD	UD		21.8086	18.8475
6	22.96	23.185	25.05	23.745	22.545	23.93	UD	UD	UD	UD	UD	UD		23.4295	18.7342
UD = undetectable with ABI7500 FAST qPCR machine
