# Supplementary material for: Assessment of Rapid MinION Nanopore DNA Virus Meta-Genomics Using Calves Experimentally Infected with Bovine Herpes Virus-1
Source: Viruses. 2022 Aug 24;14(9):1859. doi: 10.3390/v14091859 (PMC9501177; doi:10.3390/v14091859)
Supplement: Supplementary file 1 [file viruses-14-01859-s001.zip › File S2.xlsx]

## Sheet: File S2
	Depleted nasal swab 2 eluate (calf BoHV1_1)										Undepleted nasal swab 2 eluate (calf BoHV1_1)								File S2. Linear relationships between qPCR analyses and Epi2ME Fastq WIMP read counts and Epi2ME custom reference % alignments to BoHV1 reference genome.
Day post -challenge of swab collection	BoHV-1 Epi2ME Fastq WIMP read count	BoHV-1 read count log2	Epi2ME custom reference alignment % bases aligned to BoHV-1 reference genome	BoHV-1 Cq	ACTB Cq	Relative quantities 2^-(BoHV-1 Cq - ACTB Cq)	BoHV-1 genome copies per uL of swab eluate	BoHV-1 genome copies per swab (=total 3 mL eluate)	BoHV-1 Log2 genome copies per swab		BoHV-1 Cq	ACTB Cq	Relative quantities 2^-(BoHV-1 Cq - ACTB Cq)	BoHV-1 genome copies per uL of swab eluate	BoHV-1 genome copies per swab (=total 3 mL eluate)	BoHV-1 Log2 genome copies per swab
-1	0	ND	0	ND	34.4308	0	0	0	ND		ND	26.8478	0	0	0	ND
0	0	ND	0	ND	33.9752	0	0	0	ND		ND	27.2426	0	0	0	ND
0	0	ND	0	ND	33.9752	0	0	0	ND		ND	27.2426	0	0	0	ND
1	795	9.63481	12.8	23.0236	34.3858	2632.35	39803	1.19409e+08	26.8313		19.4341	26.6219	145.796	609111	1.82733e+09	30.7671
1	474	8.88874	9.4	23.0236	34.3858	2632.35	39803	1.19409e+08	26.8313		19.4341	26.6219	145.796	609111	1.82733e+09	30.7671
2	12103	13.5631	67	19.9078	34.3133	21701.8	345041	1.03512e+09	29.9472		16.8817	26.5554	816.74	3.57314e+06	1.07194e+10	33.3195
2	77625	16.2442	85.8	19.9078	34.3133	21701.8	345041	1.03512e+09	29.9472		16.8817	26.5554	816.74	3.57314e+06	1.07194e+10	33.3195
3	1779	10.7969	1.8	22.6517	32.0756	686.854	51507.3	1.54522e+08	27.2032		17.8341	23.2981	44.1382	1.84648e+06	5.53945e+09	32.3671
4	314	8.29462	4	23.9027	31.2504	162.885	21641.5	6.49246e+07	25.9523		19.4014	24.8257	42.9427	623104	1.86931e+09	30.7999
5	356	8.47573	0.5	21.8086	31.205	673.895	92400.2	2.77201e+08	28.0464		18.8475	25.3619	91.4169	914730	2.74419e+09	31.3537
6	1186	10.2119	6	23.4295	34.274	1838.73	30043.5	9.01305e+07	26.4255		18.7342	25.4322	103.827	989468	2.9684e+09	31.467
