# Supplementary material for: Assessment of Rapid MinION Nanopore DNA Virus Meta-Genomics Using Calves Experimentally Infected with Bovine Herpes Virus-1
Source: Viruses. 2022 Aug 24;14(9):1859. doi: 10.3390/v14091859 (PMC9501177; doi:10.3390/v14091859)
Supplement: Supplementary file 1 [file viruses-14-01859-s001.zip › Table S2.xlsx]

## Sheet: Table S2
polymerase	Number of PCR cycles	total number of bases sequenced	total number of reads analysed	number of bases aligned to BoHV-1 genome	number of bases unaligned to BoHV-1 genome	number of reads aligned to BoHV-1 genome	number of reads unaligned to BoHV-1 genome	percentage of bases aligned to BoHV1 genome	average length of reads aligned to BoHV-1 genome	average length of reads unaligned to BoHV-1 genome	percentage of reads BoHV1	% identity to BoHV-1 genome	% accuracy of alignment to BoHV-1 genome
Long Amp	10	280800	160	103500	177300	83	77	36.859	1246.99	2302.6	51.875	95	85.7
Long Amp	10	307200	191	142600	164600	119	72	46.4193	1198.32	2286.11	62.3037	95	85.9
Long Amp	10	197400	119	61700	135700	62	57	31.2563	995.161	2380.7	52.1008	94.9	84.9
Long Amp	20	6400000	2181	402000	5998000	58	2123	6.28125	6931.03	2825.25	2.65933	95.2	86.4
Long Amp	20	15100000	5047	753000	14347000	125	4922	4.98675	6024	2914.87	2.47672	94.8	85.5
Long Amp	20	1500000	538	6300	1493700	9	529	0.42	700	2823.63	1.67286	95.2	84.2
Long Amp	30	2000000000	558146	294300	1999705700	289	557857	0.014715	1018.34	3584.62	0.0517786	95	86.3
Long Amp	30	5300000000	1467719	603300	5299396700	461	1467258	0.011383	1308.68	3611.77	0.0314093	94.8	86.3
Long Amp	30	5800000000	1556615	759200	5799240800	576	1556039	0.0130897	1318.06	3726.93	0.0370034	94.8	86.2
Q5	10	83100	206	37800	45300	103	103	45.4874	366.99	439.806	50	95.6	87.1
Q5	10	38200	96	14800	23400	37	59	38.7435	400	396.61	38.5417	95.8	88.1
Q5	10	182500	430	87300	95200	259	171	47.8356	337.066	556.725	60.2326	95.8	88
Q5	20	12100000	32811	4200000	7900000	16511	16300	34.7107	254.376	484.663	50.3215	96.1	88.6
Q5	20	2800000	10265	381700	2418300	1741	8524	13.6321	219.242	283.705	16.9605	96.1	88.9
Q5	20	2900000	8806	892200	2007800	3453	5353	30.7655	258.384	375.079	39.2119	96.2	88.8
Q5	30	29400000	81676	8700000	20700000	28778	52898	29.5918	302.314	391.319	35.2343	96.2	88.9
Q5	30	59600000	183688	15600000	44000000	64733	118955	26.1745	240.99	369.888	35.2407	96.5	89.6
Q5	30	69000000	208228	16200000	52800000	69397	138831	23.4783	233.439	380.319	33.3274	96.5	89.7
Table S2. Comparison of BoHV-1 sequence generated from MinION sequencing libraries that were PCR amplified for 10, 20 or 30 cycles with either NEB Next Ultra II Q5 (Q5) or NEB LongAmp Taq polymerases. Total number of bases sequenced, total number of reads analysed, number of bases aligned to BoHV-1 genome, number of bases unaligned to BoHV-1 genome, number of reads aligned to BoHV-1 genome, numbe…
