# Supplementary material for: Assessment of Rapid MinION Nanopore DNA Virus Meta-Genomics Using Calves Experimentally Infected with Bovine Herpes Virus-1
Source: Viruses. 2022 Aug 24;14(9):1859. doi: 10.3390/v14091859 (PMC9501177; doi:10.3390/v14091859)
Supplement: Supplementary file 1 [file viruses-14-01859-s001.zip › Table S3.xlsx]

## Sheet: Table S3
			total read counts								% of analysed reads						% of classified reads
Table S3. Read counts, % read counts (of classified reads), % read counts (of classified plus unclassified reads) of taxa (BoHV-1, Other viruses, Eukaryotes, Bacteria, Archaea) assigned after ‘EPI2ME Fastq WIMP Workflow’ analysis of FASTQ files generated by the MinION sequence protocol (bead-beating, nuclease depletion, Q5 amplification with 40 s extension) from swabs from the experimental challe…	calf code	day of challenge	BoHV-1	bacteria	eukaryote	archaea	other viruses	reads classified	reads analysed	average read length (bases)	% BoHV-1	% bacteria	% eukaryote	% archaea	% other viruses	% reads classified	% BoHV-1	% bacteria	% eukaryote	% archaea	% other viruses
	PBS_1	-1	0	16535	7041	32	43	23879	76275	2605	0	21.6781	9.23107	0.0419535	0.056375	31.3065	0	69.2449	29.4862	0.134009	0.180075
	PBS_1	0	0	758.5	273.5	1.5	1	1045.5	4604	2445	0	16.4748	5.94049	0.0325804	0.0217202	22.7085	0	72.549	26.1597	0.143472	0.095648
	PBS_1	1	0	20208	7018	52.5	28.5	27522.5	101916	2630	0	19.828	6.88603	0.0515128	0.0279641	27.005	0	73.4236	25.4991	0.190753	0.103552
	PBS_1	2	0	66212.5	17362.5	89.5	144.5	84391	208520	2833	0	31.7536	8.32656	0.0429216	0.0692981	40.4715	0	78.4592	20.5739	0.106054	0.171227
	PBS_1	3	0	36118	24412	41	47	60907	130640	2518	0	27.647	18.6865	0.031384	0.0359767	46.622	0	59.3002	40.0808	0.0673157	0.0771668
	PBS_1	4	0	550	230	0	1	781	1444	2213	0	38.0886	15.928	0	0.0692521	54.0859	0	70.4225	29.4494	0	0.128041
	PBS_1	5	0	112479	61873	67	103	175222	332912	2713	0	33.7864	18.5854	0.0201254	0.0309391	52.6331	0	64.1923	35.3112	0.0382372	0.0587826
	PBS_1	6	0	87014	33245	88	118	121109	267757	2855	0	32.4974	12.4161	0.0328656	0.0440698	45.2309	0	71.8477	27.4505	0.0726618	0.0974329
		PBS extraction control 1	0	90	946	0	0	1036	1084	2153	0	8.30258	87.2694	0	0	95.572	0	8.68726	91.3127	0	0
	PBS_2	-1	0	851	69	1	0	921	1479	1479	0	57.5389	4.66531	0.0676133	0	62.2718	0	92.3996	7.49186	0.108578	0
	PBS_2	0	0	3465.5	317	0.5	2.5	3798	5460	2306	0	63.4707	5.80586	0.00915751	0.0457875	69.5604	0	91.2454	8.3465	0.0131648	0.0658241
	PBS_2	1	0	32222.5	25364	13	24	57869	115355	2152	0	27.9333	21.9878	0.0112696	0.0208053	50.166	0	55.6818	43.83	0.0224645	0.041473
	PBS_2	2	0	21309.5	14470	29.5	138.5	36223.5	90605.5	2348.5	0	23.519	15.9703	0.0325587	0.15286	39.9794	0	58.8278	39.9464	0.0814388	0.382348
	PBS_2	3	0	1011	545	0	1	1565	3135	2285	0	32.2488	17.3844	0	0.0318979	49.9203	0	64.6006	34.8243	0	0.0638978
	PBS_2	4	0	27009	16413	9	16	43633	91174	1870	0	29.6236	18.0018	0.00987124	0.0175489	47.8568	0	61.9004	37.616	0.0206266	0.0366695
	PBS_2	5	0	2120	1558	1	3	3694	7583	2249	0	27.9573	20.546	0.0131874	0.0395622	48.7142	0	57.3904	42.1765	0.0270709	0.0812128
	PBS_2	6	0	1392	1039	0	6	2449	4976	2297	0	27.9743	20.8802	0	0.120579	49.2162	0	56.8395	42.4255	0	0.244998
		PBS extraction control 2	0	85	131	0	0	218	532	704	0	15.9774	24.6241	0	0	40.9774	0	38.9908	60.0917	0	0
	PBS_3	-1	0	1649	285	1	2	1949	4549	1905	0	36.2497	6.26511	0.0219829	0.0439657	42.8446	0	84.6075	14.6229	0.0513084	0.102617
	PBS_3	0	0	18848	920.5	4	10.5	19853	29531	2605.5	0	63.8245	3.11706	0.0135451	0.0355559	67.2277	0	94.9378	4.63658	0.0201481	0.0528887
	PBS_3	1	0	16142.5	9119.5	10	44	25472	50381.5	2535	0	32.0405	18.1009	0.0198486	0.0873336	50.5582	0	63.3735	35.8021	0.0392588	0.172739
	PBS_3	2	0	16009.5	8507	13.5	30.5	24693	49666.5	2557	0	32.234	17.1282	0.0271813	0.0614096	49.7176	0	64.8342	34.4511	0.0546714	0.123517
	PBS_3	3	0	55869	39665	22	113	96220	193321	2515	0	28.8996	20.5177	0.01138	0.058452	49.7721	0	58.0638	41.2232	0.0228643	0.117439
	PBS_3	4	0	4187	1892	4	5	6131	13390	1955	0	31.2696	14.1299	0.029873	0.0373413	45.7879	0	68.2923	30.8596	0.0652422	0.0815528
	PBS_3	5	0	81148	31240	15	120	113081	197553	2645	0	41.0766	15.8135	0.0075929	0.0607432	57.2408	0	71.761	27.6262	0.0132648	0.106119
	PBS_3	6	0	95165	46927	17	135	142825	260596	2530	0	36.5182	18.0076	0.00652351	0.0518043	54.8071	0	66.6305	32.8563	0.0119027	0.0945213
		PBS extraction control 3	0	19	27	0	0	47	90	812	0	21.1111	30	0	0	52.2222	0	40.4255	57.4468	0	0
	PBS_4	-1	0	6109	3785	2	23	9989	21602	2692	0	28.2798	17.5215	0.0092584	0.106472	46.2411	0	61.1573	37.8917	0.020022	0.230253
	PBS_4	0	0	1628	1127	4	12.5	4064.5	8440.5	2510.5	0	19.288	13.3523	0.0473906	0.148095	48.1547	0	40.0541	27.7279	0.0984131	0.307541
	PBS_4	1	0	28942	3321	8.5	93.5	32487.5	45346	2833	0	63.8248	7.32369	0.0187448	0.206192	71.6436	0	89.0866	10.2224	0.0261639	0.287803
	PBS_4	2	0	42345	2183	15.5	131.5	44858.5	81133.5	2958	0	52.1918	2.69063	0.0191043	0.162079	55.2897	0	94.3968	4.86641	0.0345531	0.293144
	PBS_4	3	0	87222	21640	63	360	109883	242166	2873	0	36.0174	8.93602	0.0260152	0.148658	45.3751	0	79.3772	19.6937	0.0573337	0.327621
	PBS_4	4	0	6770	4254	1	13	11105	22124	2578	0	30.6003	19.228	0.00451998	0.0587597	50.1944	0	60.9635	38.3071	0.00900495	0.117064
	PBS_4	5	0	87079	4787	7	411	92537	105190	2946	0	82.7826	4.55081	0.00665462	0.390722	87.9713	0	94.1018	5.17307	0.00756454	0.444147
	PBS_4	6	0	24	6	0	0	31	65	1610	0	36.9231	9.23077	0	0	47.6923	0	77.4194	19.3548	0	0
		PBS extraction control 4	0	8	5	0	0	13	73	710	0	10.9589	6.84932	0	0	17.8082	0	61.5385	38.4615	0	0
	PBS_5	-1	0	22396	18163	10	145	41032	82486	2727	0	27.1513	22.0195	0.0121233	0.175787	49.7442	0	54.5818	44.2655	0.0243712	0.353383
	PBS_5	0	0	7490	962.5	4	9	8537	18833.5	2954	0	39.7696	5.11057	0.0212388	0.0477872	45.3288	0	87.7357	11.2745	0.0468549	0.105423
	PBS_5	1	0	18035	4088.5	4.5	5	22201	32363	2977.5	0	55.7272	12.6333	0.0139048	0.0154497	68.5999	0	81.2351	18.4158	0.0202694	0.0225215
	PBS_5	2	0	65064.5	37851	12	79	103424	175941	3062.5	0	36.9809	21.5135	0.00682047	0.0449014	58.7836	0	62.9101	36.5977	0.0116027	0.0763842
	PBS_5	3	0	177829	114134	38	373	293599	555690	2547	0	32.0015	20.5391	0.00683835	0.0671238	52.835	0	60.5687	38.8741	0.0129428	0.127044
	PBS_5	4	0	169880	35993	19	565	207245	285723	2884	0	59.4562	12.5972	0.0066498	0.197744	72.5335	0	81.9706	17.3674	0.00916789	0.272624
	PBS_5	5	0	110805	4753	1	16	115648	125299	3053	0	88.4325	3.79333	0.000798091	0.0127695	92.2976	0	95.8123	4.10989	0.000864693	0.0138351
	PBS_5	6		12802	7768	3	27	20693	36389	2929	0	35.181	21.3471	0.00824425	0.0741982	56.8661	0	61.8663	37.5393	0.0144977	0.130479
		PBS extraction control 5	0	6	4	0	0	10	25	1786	0	24	16	0	0	40	0	60	40	0	0
	PBS_6	-1	0	972	296	0	9	1296	4225	2273	0	23.0059	7.00592	0	0.213018	30.6746	0	75	22.8395	0	0.694444
	PBS_6	0	0	1784.5	263.5	2	1.5	2066.5	4641	2631.5	0	38.4508	5.67766	0.0430942	0.0323206	44.527	0	86.3537	12.751	0.096782	0.0725865
	PBS_6	1	0	1316.5	454.5	2	3	1788	4437	2364	0	29.6709	10.2434	0.0450755	0.0676133	40.2975	0	73.6298	25.4195	0.111857	0.167785
	PBS_6	2	0	42529.5	20981.5	19.5	94	63953.5	114660	2824.5	0	37.0918	18.2989	0.0170068	0.0819815	55.7766	0	66.5007	32.8074	0.0304909	0.146982
	PBS_6	3	0	191252	42263	27	90	234137	349186	2572	0	54.7708	12.1033	0.00773227	0.0257742	67.0522	0	81.6838	18.0505	0.0115317	0.038439
	PBS_6	4	0	18403	11264	23	56	29989	67133	2560	0	27.4127	16.7786	0.0342603	0.0834165	44.671	0	61.3658	37.5604	0.0766948	0.186735
	PBS_6	5	0	4	6	0	0	10	51	982	0	7.84314	11.7647	0	0	19.6078	0	40	60	0	0
	PBS_6	6	0	5970	2081	10	26	8215	36686	2690	0	16.2732	5.67246	0.0272584	0.0708717	22.3927	0	72.6719	25.3317	0.121729	0.316494
		PBS extraction control 6	0	3	21	0	0	24	33	1354	0	9.09091	63.6364	0	0	72.7273	0	12.5	87.5	0	0
	BoHV1_1	-1	0	72	170	0	0	248	6115	602.5	0	1.17743	2.78005	0	0	4.0556	0	29.0323	68.5484	0	0
	BoHV1_1	0	0.5	1969	4311	5	1.5	6333	33782	1405.6	0.00148008	5.82855	12.7612	0.0148008	0.00444023	18.7467	0.00789515	31.0911	68.072	0.0789515	0.0236855
	BoHV1_1	1	634.5	63	638	0	52	1394.5	7702.5	975.55	8.23759	0.817916	8.28302	0	0.675105	18.1045	45.5002	4.51775	45.7512	0	3.72894
	BoHV1_1	2	44864	523.5	979.5	0.5	1816	48219	58749.5	1782.85	76.3649	0.891071	1.66725	0.000851071	3.09109	82.0756	93.0422	1.08567	2.03136	0.00103694	3.76615
	BoHV1_1	3	1779	6015	1631	4	125	9617	141081	1164	1.26098	4.26351	1.15607	0.00283525	0.0886016	6.81665	18.4985	62.5455	16.9596	0.041593	1.29978
	BoHV1_1	4	314	190	413	1	26	956	16224	939	1.9354	1.1711	2.54561	0.00616371	0.160256	5.8925	32.8452	19.8745	43.2008	0.104603	2.71967
	BoHV1_1	5	356	277	300	1	48	989	36692	919.8	0.970239	0.754933	0.817617	0.00272539	0.130819	2.69541	35.996	28.0081	30.3337	0.101112	4.85339
	BoHV1_1	6	1186	4442	772	0	98	6540	19438	1185	6.10145	22.8521	3.9716	0	0.504167	33.6454	18.1346	67.9205	11.8043	0	1.49847
		PBS extraction control 7	1	52	24	0	0	82	762	509.6	0.131234	6.82415	3.14961	0	0	10.7612	1.21951	63.4146	29.2683	0	0
	BoHV1_2	-1	1	134	13	0	0	153	291	1151	0.343643	46.0481	4.46735	0	0	52.5773	0.653595	87.5817	8.49673	0	0
	BoHV1_2	0	1.5	138	31	0	0	271	290.5	1186	0.516351	47.5043	10.6713	0	0	93.2874	0.553506	50.9225	11.4391	0	0
	BoHV1_2	1	69864	68078.5	5199.5	3	1875	145154	167210	2365.5	41.7822	40.7144	3.10956	0.00179415	1.12134	86.8097	48.1308	46.9007	3.58205	0.00206676	1.29173
	BoHV1_2	2	3024	57708	5435	55	136	66642	151693	2390	1.9935	38.0426	3.58289	0.0362574	0.0896548	43.9322	4.53768	86.594	8.15552	0.0825305	0.204076
	BoHV1_2	3	204042	61905	9834	5	4531	280532	309415	2669	65.9444	20.0071	3.17826	0.00161595	1.46438	90.6653	72.7339	22.067	3.50548	0.00178233	1.61515
	BoHV1_2	4	26519	116781	20406	10	804	164924	221936	2345	11.9489	52.6192	9.19454	0.0045058	0.362267	74.3115	16.0795	70.809	12.373	0.0060634	0.487497
	BoHV1_2	5	6.5	189.5	362	0	3	575.5	918	2135	0.708061	20.6427	39.4336	0	0.326797	62.6906	1.12945	32.9279	62.9018	0	0.521286
	BoHV1_2	6	883.5	211206	3191.5	1.5	28.5	215384	224230	2574	0.394016	94.1921	1.42332	0.000668957	0.0127102	96.0552	0.410198	98.0604	1.48177	0.000696431	0.0132322
		PBS extraction control 8	2	19	531	0	0	553	633	2265	0.315956	3.00158	83.8863	0	0	87.3618	0.361664	3.4358	96.0217	0	0
	BoHV1_3	-1	0	6171	8293	5	143	14737	30289	2458	0	20.3737	27.3796	0.0165076	0.472119	48.6546	0	41.8742	56.2733	0.0339282	0.970347
	BoHV1_3	0	0	2018.5	1677.5	0.5	16	3731.5	5962	2051.5	0	33.8561	28.1365	0.00838645	0.268366	62.5881	0	54.0935	44.9551	0.0133994	0.428782
	BoHV1_3	1	7.5	46887	27130.5	13.5	626	75274	116772	2737.5	0.0064228	40.1528	23.2338	0.011561	0.53609	64.4626	0.0099636	62.2884	36.0423	0.0179345	0.831628
	BoHV1_3	2	1606.5	36389	11013	4.5	258	49436	67130.5	2724.5	2.3931	54.2064	16.4054	0.00670336	0.384326	73.6416	3.24966	73.6083	22.2773	0.00910268	0.521887
	BoHV1_3	3	0.5	49.5	64.5	0	2	129	198	2106.5	0.252525	25	32.5758	0	1.0101	65.1515	0.387597	38.3721	50	0	1.55039
	BoHV1_3	4	220	35063	1374	1	40	36719	59542	1101	0.369487	58.8878	2.30761	0.00167949	0.0671795	61.6691	0.599145	95.4901	3.74193	0.00272339	0.108935
	BoHV1_3	5	103	13284	17336	4	306	31336	60845	2555	0.169283	21.8325	28.4921	0.00657408	0.502917	51.5014	0.328695	42.3921	55.323	0.0127649	0.976513
	BoHV1_3	6	2218	143107	137534	38	2253	287416	536324	2743	0.413556	26.6829	25.6438	0.00708527	0.420082	53.59	0.771704	49.7909	47.8519	0.0132213	0.783881
		PBS extraction control 9	0	180	1337	0	3	1523	1751	2517	0	10.2798	76.3564	0	0.171331	86.9789	0	11.8188	87.7873	0	0.19698
	BoHV1_4	-1	0	75049	47030	15	302	122972	213192	2758	0	35.2025	22.0599	0.00703591	0.141656	57.6813	0	61.0293	38.2445	0.0121979	0.245584
	BoHV1_4	0	0	10576	4217.5	2.5	25	14882.5	25872.5	2637	0	40.8774	16.3011	0.00966277	0.0966277	57.5225	0	71.0633	28.3387	0.0167983	0.167983
	BoHV1_4	1	174	6856	4634.67	1.33333	23.6667	13313.7	16700.7	2831	1.04187	41.0523	27.7514	0.00798371	0.141711	79.7194	1.30693	51.496	34.8113	0.0100148	0.177762
	BoHV1_4	2	46381	80590	1762	1	390	129178	133888	3391	34.6416	60.1921	1.31603	0.000746893	0.291288	96.4821	35.9047	62.3868	1.36401	0.000774126	0.301909
	BoHV1_4	3	477.5	26342.5	8117	9.5	157	35270	50882.5	3065.5	0.938437	51.7712	15.9524	0.0186705	0.308554	69.3166	1.35384	74.6881	23.0139	0.0269351	0.445138
	BoHV1_4	4	259	223914	112737	41	32	338024	535708	3275	0.0483472	41.7978	21.0445	0.00765342	0.0059734	63.0986	0.0766218	66.242	33.3518	0.0121293	0.00946678
	BoHV1_4	5	182	122398	39610	18	296	163080	236417	2982	0.0769826	51.7721	16.7543	0.00761367	0.125203	68.9798	0.111602	75.054	24.2887	0.0110375	0.181506
	BoHV1_4	6	47	194269	25219	9	388	220472	263503	3059	0.0178366	73.7255	9.57067	0.00341552	0.147247	83.6696	0.0213179	88.115	11.4386	0.00408215	0.175986
		PBS extraction control 10	0	34	282	0	0	316	341	2444	0	9.97067	82.6979	0	0	92.6686	0	10.7595	89.2405	0	0
	BoHV1_5	-1	0	97276	40362	17	228	138490	227846	2780	0	42.6937	17.7146	0.00746118	0.100068	60.7823	0	70.2405	29.1443	0.0122753	0.164633
	BoHV1_5	0	0	26017	18849.5	9.5	77.5	45173.5	79080	2782	0	32.8996	23.836	0.0120132	0.098002	57.1238	0	57.5935	41.7269	0.02103	0.171561
	BoHV1_5	1	133.667	58099.3	62172.3	18.6667	231	156529	166255	2902.33	0.0803984	34.9458	37.3957	0.0112277	0.138943	94.1496	0.0853944	37.1174	39.7195	0.0119254	0.147577
	BoHV1_5	2	1404.5	32057	20747.5	12	172.5	54655	89824	2958.5	1.56361	35.6887	23.0979	0.0133595	0.192042	60.8468	2.56976	58.6534	37.9608	0.0219559	0.315616
	BoHV1_5	3	385	4775	2889	4	23	8117	14389	2501	2.67566	33.1851	20.0778	0.027799	0.159844	56.4111	4.74313	58.8272	35.592	0.0492793	0.283356
	BoHV1_5	4	939	12866.5	13172.5	3	120.5	27459.5	46526.5	2413	2.0182	27.6541	28.3118	0.00644794	0.258992	59.0191	3.41958	46.8563	47.9706	0.0109252	0.438828
	BoHV1_5	5	86	3249	2586	0	68	6034	10421	2474	0.825257	31.1774	24.8153	0	0.652529	57.9023	1.42526	53.8449	42.8571	0	1.12695
	BoHV1_5	6	110	8058	7054	4	135	15511	28693	2796	0.383369	28.0835	24.5844	0.0139407	0.470498	54.0585	0.709174	51.9502	45.4774	0.0257882	0.87035
		PBS extraction control 11	0	229	462	0	0	692	784	2546	0	29.2092	58.9286	0	0	88.2653	0	33.0925	66.763	0	0
	BoHV1_6	-1	0	108888	24018	8	577	134074	175032	2867	0	62.2103	13.7221	0.00457059	0.329654	76.5997	0	81.2149	17.914	0.00596685	0.430359
	BoHV1_6	0	0	24295.5	10768.5	3	62	35257.5	56567	2708	0	42.95	19.0367	0.00530345	0.109605	62.3287	0	68.9087	30.5424	0.00850883	0.175849
	BoHV1_6	1	7.33333	78346	128790	16	384.333	227378	250480	2934	0.00292772	31.2784	51.4175	0.00638774	0.153439	90.7769	0.00322518	34.4563	56.6416	0.00703675	0.169029
	BoHV1_6	2	554	6671	4330	2	140	11797	20990	2665	2.63935	31.7818	20.6289	0.00952835	0.666984	56.203	4.69611	56.5483	36.7042	0.0169535	1.18674
	BoHV1_6	3	751	42804	9815	2	240	53831	72638	2942	1.03389	58.9278	13.5122	0.00275338	0.330406	74.1086	1.39511	79.5155	18.233	0.00371533	0.44584
	BoHV1_6	4	1097.33	4724.33	53839.7	1.66667	113.667	60098.7	64057.7	2823.67	1.71304	7.37513	84.0487	0.00260182	0.177444	93.8196	1.82589	7.86096	89.5855	0.00277322	0.189133
	BoHV1_6	5	355	8363	4436	3	98	13356	21401	2808	1.6588	39.0776	20.728	0.014018	0.457923	62.4083	2.65798	62.6161	33.2135	0.0224618	0.733753
	BoHV1_6	6	2300	403792	49751	22	1044	458003	543924	3041	0.422853	74.2368	9.14668	0.00404468	0.191939	84.2035	0.50218	88.1636	10.8626	0.00480346	0.227946
		PBS extraction control 12	0	78	224	0	0	303	420	2349	0	18.5714	53.3333	0	0	72.1429	0	25.7426	73.9274	0	0
