# Supplementary material for: Assessment of Rapid MinION Nanopore DNA Virus Meta-Genomics Using Calves Experimentally Infected with Bovine Herpes Virus-1
Source: Viruses. 2022 Aug 24;14(9):1859. doi: 10.3390/v14091859 (PMC9501177; doi:10.3390/v14091859)
Supplement: Supplementary file 1 [file viruses-14-01859-s001.zip › Table S4.xlsx]

## Sheet: Table S4
Table S4. Read counts of all virus taxa assigned after ‘EPI2ME Fastq WIMP Workflow analysis’ of FASTQ files generated by the MinION sequence protocol (bead beating, nuclease depletion, Q5 amplification with 40 s extension) from swabs from the experimental challenge of calves with PBS (n=6) or BoHV-1 (n=6).					Calf PBS_1 (PBS challenged)						Calf PBS_2 (PBS challenged)						Calf PBS_3 (PBS challenged)						Calf PBS_4 (PBS challenged)						Calf PBS_5 (PBS challenged)						Calf PBS_6 (PBS challenged)						Calf BoHV1_1 (BoHV1 challenged)						Calf BoHV1_2 (BoHV1 challenged)
					day	Barcode	Taxon	Reads	Rank		day	Barcode	Taxon	Reads	Rank		day	Barcode	Taxon	Reads	Rank			Barcode	Taxon	Reads	Rank			Barcode	Taxon	Reads	Rank			Barcode	Taxon	Reads	Rank		day	Barcode	Taxon	Reads	Rank		day	Barcode	Taxon
					-1	bc1	Proteus phage VB_PmiS-Isfahan	23	species		-1	bc1	no virus detected	no virus detected	no virus detected		-1	bc1	Proteus phage VB_PmiS-Isfahan	1	species		-1	bc1	Proteus phage VB_PmiS-Isfahan	21	species		-1	bc1	Proteus phage VB_PmiS-Isfahan	140	species		-1	bc1	Proteus phage VB_PmiS-Isfahan	140	species		-1	bc1	no virus detected	no virus detected	no virus detected		-1	bc1	Bovine alphaherpesvirus 1
					-1	bc1	Bacillus virus G	3	species		0	bc2	Proteus phage VB_PmiS-Isfahan	4	species		-1	bc1	Mannheimia phage vB_MhM_1127AP1	1	species		-1	bc1	unclassified Peduovirus	2	no rank		-1	bc1	Orf virus	2	species		-1	bc1	Orf virus	2	species		0	bc2	Bovine alphaherpesvirus 1	1	species		0	bc2	Bovine alphaherpesvirus 1
					-1	bc1	Prochlorococcus phage MED4-213	2	no rank		0	bc2	Mannheimia phage vB_MhM_1127AP1	1	species		0	bc2	Proteus phage VB_PmiS-Isfahan	3	species		0	bc2	Proteus phage VB_PmiS-Isfahan	16	species		-1	bc1	Bacillus phage DIGNKC	1	species		-1	bc1	Bacillus phage DIGNKC	1	species		0	bc2	Pseudaletia unipuncta granulovirus	1	species		0	bc3	Bovine alphaherpesvirus 1
					-1	bc1	Timquatrovirus	2	genus		0	bc3	no virus detected				0	bc2	Streptococcus phage A25	1	species		0	bc3	Proteus phage VB_PmiS-Isfahan	9	species		-1	bc1	Human alphaherpesvirus 3	1	species		-1	bc1	Human alphaherpesvirus 3	1	species		0	bc3	Enterobacteria phage T7	1	no rank		1	bc4	Bovine alphaherpesvirus 1
					-1	bc1	Synechococcus phage S-PM2	1	species		1	bc4	Proteus phage VB_PmiS-Isfahan	23	species		0	bc3	Proteus phage VB_PmiS-Isfahan	11	species		1	bc4	Proteus phage VB_PmiS-Isfahan	47	species		-1	bc1	Anomala cuprea entomopoxvirus	1	species		-1	bc1	Anomala cuprea entomopoxvirus	1	species		0	bc3	unclassified Myoviridae	1	no rank		1	bc4	Bovine alphaherpesvirus 5
					-1	bc1	Streptomyces phage Bing	1	no rank		1	bc4	Myoviridae	3	family		0	bc3	Streptococcus phage phiARI0468-4	1	species		1	bc4	unclassified Peduovirus	34	no rank		0	bc2	Proteus phage VB_PmiS-Isfahan	10	species		0	bc2	Proteus phage VB_PmiS-Isfahan	10	species		1	bc4	Bovine alphaherpesvirus 1	795	species		1	bc4	Varicellovirus
					-1	bc1	Clavibacter phage CN1A	1	no rank		1	bc4	Cronobacter phage vB_CsaM_GAP32	1	species		0	bc3	Mannheimia phage vB_MhM_1127AP1	1	species		1	bc4	Mannheimia phage vB_MhM_1127AP1	31	species		0	bc3	Proteus phage VB_PmiS-Isfahan	7	species		0	bc3	Proteus phage VB_PmiS-Isfahan	7	species		1	bc4	Varicellovirus	33	genus		1	bc4	Bubaline alphaherpesvirus 1
					-1	bc1	Rhodococcus phage ReqiPepy6	1	no rank		1	bc4	Citrobacter phage Margaery	1	species		0	bc3	Bacillus virus G	1	species		1	bc4	Mannheimia phage vB_MhM_587AP1	27	species		0	bc3	Esparto virus	1	species		0	bc3	Esparto virus	1	species		1	bc4	Bovine alphaherpesvirus 5	26	species		1	bc4	Proteus phage VB_PmiS-Isfahan
					-1	bc1	Streptococcus phage phiNJ2	1	species		1	bc4	Enterococcus phage SAP6	1	no rank		0	bc3	Acinetobacter phage YMC13/03/R2096	1	species		1	bc4	Acinetobacter phage YMC13/03/R2096	2	species		1	bc4	Proteus phage VB_PmiS-Isfahan	7	species		1	bc4	Proteus phage VB_PmiS-Isfahan	7	species		1	bc4	Cercopithecine alphaherpesvirus 2	1	species		1	bc4	unclassified Peduovirus
					-1	bc1	Cheoctovirus	1	genus		1	bc4	Staphylococcus phage StB12	1	species		0	bc3	Kochikohdavirus	1	genus		1	bc4	Bacillus virus G	1	species		1	bc4	Lactobacillus phage P1	1	no rank		1	bc4	Lactobacillus phage P1	1	no rank		1	bc4	Enterobacteria phage T7	1	no rank		1	bc4	Alphaherpesvirinae
					-1	bc1	Rimavirus	1	genus		1	bc4	Phormidium virus WMP3	1	species		0	bc3	Phaeocystis globosa virus	1	species		1	bc4	Prochlorococcus phage MED4-213	1	no rank		1	bc4	Acinetobacter phage YMC13/03/R2096	1	species		1	bc4	Acinetobacter phage YMC13/03/R2096	1	species		1	bc4	Molluscum contagiosum virus subtype 1	1	no rank		1	bc4	Ateline alphaherpesvirus 1
					-1	bc1	Smoothievirus	1	genus		1	bc4	Equid gammaherpesvirus 5	1	species		1	bc4	Proteus phage VB_PmiS-Isfahan	65	species		1	bc4	Agrotis segetum nucleopolyhedrovirus A	1	species		1	bc4	Actinidia chlorotic ringspot-associated virus	1	no rank		1	bc4	Actinidia chlorotic ringspot-associated virus	1	no rank		1	bc5	Bovine alphaherpesvirus 1	474	species		1	bc4	Macacine alphaherpesvirus 1
					-1	bc1	Lactobacillus phage Lpa804	1	no rank		1	bc4	Leucania separata nucleopolyhedrovirus	1	species		1	bc4	Bacillus virus G	3	species		1	bc4	Cryptophlebia leucotreta granulovirus	1	species		1	bc5	no virus detected				1	bc5	no virus detected				1	bc5	Varicellovirus	27	genus		1	bc4	Noumeavirus
					-1	bc1	Brockvirinae	1	subfamily		1	bc4	Cafeteria roenbergensis virus BV-PW1	1	no rank		1	bc5	Proteus phage VB_PmiS-Isfahan	20	species		1	bc4	Cafeteria roenbergensis virus BV-PW1	1	no rank		2	bc6	Proteus phage VB_PmiS-Isfahan	98	species		2	bc6	Proteus phage VB_PmiS-Isfahan	98	species		1	bc5	Bovine alphaherpesvirus 5	13	species		1	bc4	Pithovirus sibericum
					-1	bc1	Cafeteria roenbergensis virus BV-PW1	1	no rank		1	bc4	Tipula oleracea nudivirus	1	species		2	bc6	Proteus phage VB_PmiS-Isfahan	38	species		1	bc5	unclassified Peduovirus	17	no rank		2	bc6	Mouse mammary tumor virus	3	species		2	bc6	Mouse mammary tumor virus	3	species		1	bc5	Alphaherpesvirinae	1	subfamily		1	bc4	Tokyovirus A1
					-1	bc1	Picornaviridae sp. rodent/Ee/PicoV/NX2015	1	no rank		1	bc4	Beauveria bassiana RNA virus 1	1	species		2	bc6	Vibrio phage PWH3a-P1	1	species		1	bc5	Proteus phage VB_PmiS-Isfahan	12	species		2	bc6	Cronobacter phage vB_CsaM_GAP32	1	species		2	bc6	Cronobacter phage vB_CsaM_GAP32	1	species		1	bc5	Molluscum contagiosum virus subtype 1	1	no rank		1	bc5	Bovine alphaherpesvirus 1
					-1	bc1	Choristoneura rosaceana entomopoxvirus 'L'	1	no rank		1	bc4	Beihai barnacle virus 4	1	species		2	bc6	Choristoneura fumiferana multiple nucleopolyhedrovirus	1	species		1	bc5	Mannheimia phage vB_MhM_587AP1	8	species		2	bc6	Serratia phage vB-Sru-IME250	1	no rank		2	bc6	Serratia phage vB-Sru-IME250	1	no rank		2	bc6	Bovine alphaherpesvirus 1	12103	species		1	bc5	Bovine alphaherpesvirus 5
					0	bc2	no virus detected				1	bc4	Phaeocystis globosa virus	1	species		2	bc6	Parrot bornavirus 7	1	no rank		1	bc5	Mannheimia phage vB_MhM_1127AP1	4	species		2	bc6	Bovine gammaherpesvirus 6	1	species		2	bc6	Bovine gammaherpesvirus 6	1	species		2	bc6	Varicellovirus	763	genus		1	bc5	Bubaline alphaherpesvirus 1
					0	bc3	Proteus phage VB_PmiS-Isfahan	2	species		1	bc5	Proteus phage VB_PmiS-Isfahan	9	species		2	bc7	Proteus phage VB_PmiS-Isfahan	19	species		2	bc6	Acinetobacter phage YMC13/03/R2096	56	species		2	bc6	Bovine gammaherpesvirus 4	1	species		2	bc6	Bovine gammaherpesvirus 4	1	species		2	bc6	Bovine alphaherpesvirus 5	345	species		1	bc5	Escherichia phage T7
					1	bc4	Timquatrovirus	14	genus		1	bc5	Pseudomonas phage NH-4	1	no rank		2	bc7	Bovine gammaherpesvirus 4	1	species		2	bc6	Proteus phage VB_PmiS-Isfahan	5	species		2	bc6	RD114 retrovirus	1	species		2	bc6	RD114 retrovirus	1	species		2	bc6	dsDNA viruses, no RNA stage	1	no rank		1	bc5	Mannheimia phage vB_MhM_587AP1
					1	bc4	Proteus phage VB_PmiS-Isfahan	12	species		2	bc6	Proteus phage VB_PmiS-Isfahan	39	species		3	bc8	Proteus phage VB_PmiS-Isfahan	104	species		2	bc6	Phietavirus	2	genus		2	bc6	Shuangao lacewing virus 2	1	species		2	bc6	Shuangao lacewing virus 2	1	species		2	bc6	Suid alphaherpesvirus 1	1	species		1	bc5	Proteus phage VB_PmiS-Isfahan
					1	bc4	Streptococcus phage phiNJ2	1	species		2	bc6	Bacillus virus G	1	species		3	bc8	Staphylococcus virus 37	1	species		2	bc6	Bacillus phage phi4B1	1	species		2	bc6	Choristoneura biennis entomopoxvirus	1	species		2	bc6	Choristoneura biennis entomopoxvirus	1	species		2	bc6	Ateline alphaherpesvirus 1	1	species		1	bc5	Spodoptera litura granulovirus
					1	bc4	Cheoctovirus	1	genus		2	bc6	Acinetobacter phage YMC13/03/R2096	1	species		3	bc8	Synechococcus phage ACG-2014g	1	species		2	bc6	Psychrobacter phage Psymv2	1	species		2	bc6	Bathycoccus sp. RCC1105 virus BpV1	1	no rank		2	bc6	Bathycoccus sp. RCC1105 virus BpV1	1	no rank		2	bc6	Macacine alphaherpesvirus 1	1	species		1	bc5	Streptococcus phage A25
					1	bc4	Smoothievirus	1	genus		2	bc6	Timquatrovirus	1	genus		3	bc8	Prochlorococcus phage MED4-213	1	no rank		2	bc6	Sinorhizobium phage phiLM21	1	species		2	bc6	Invertebrate iridovirus 25	1	species		2	bc6	Invertebrate iridovirus 25	1	species		2	bc7	Bovine alphaherpesvirus 1	77625	species		1	bc5	unclassified Peduovirus
					1	bc4	Bacillus virus G	1	species		2	bc6	Acidianus filamentous virus 9	1	species		3	bc8	Shigella phage SfMu	1	no rank		2	bc6	Myoviridae	1	family		2	bc6	Choristoneura biennis entomopoxvirus	1	species		2	bc6	Choristoneura biennis entomopoxvirus	1	species		2	bc7	Bovine alphaherpesvirus 5	1385	species		1	bc5	Varicellovirus
					1	bc4	Acinetobacter phage YMC13/03/R2096	1	species		2	bc7	Proteus phage VB_PmiS-Isfahan	208	species		3	bc8	Buzura suppressaria nucleopolyhedrovirus	1	species		2	bc6	unclassified Myoviridae	1	no rank		2	bc6	Shuangao lacewing virus 2	1	species		2	bc6	Shuangao lacewing virus 2	1	species		2	bc7	Varicellovirus	1125	genus		2	bc6	Bovine alphaherpesvirus 1
					1	bc4	Synechococcus phage S-SKS1	1	species		2	bc7	Timquatrovirus	11	genus		3	bc8	Acanthocystis turfacea chlorella virus 1	1	species		2	bc6	Clostridium phage phiCD506	1	species		2	bc6	Alphabaculovirus	1	genus		2	bc6	Alphabaculovirus	1	genus		2	bc7	Alphaherpesvirinae	3	subfamily		2	bc6	Proteus phage VB_PmiS-Isfahan
					1	bc4	Prochlorococcus phage MED4-213	1	no rank		2	bc7	Bacillus virus G	4	species		3	bc8	Invertebrate iridescent virus 6	1	species		2	bc6	Erwinia phage vB_EamM_Special G	1	no rank		2	bc7	Proteus phage VB_PmiS-Isfahan	32	species		2	bc7	Proteus phage VB_PmiS-Isfahan	32	species		2	bc7	Suid alphaherpesvirus 1	1	species		2	bc6	Bovine alphaherpesvirus 5
					1	bc4	Lactobacillus phage Lpa804	1	no rank		2	bc7	unclassified Fromanvirus	2	no rank		3	bc8	Orf virus	1	species		2	bc6	Pseudomonas phage PhiPA3	1	species		2	bc7	Corynebacterium phage phi674	2	no rank		2	bc7	Corynebacterium phage phi674	2	no rank		2	bc7	Simplexvirus	1	genus		2	bc6	Varicellovirus
					1	bc4	Bacillus phage Zuko	1	species		2	bc7	Acinetobacter phage YMC13/03/R2096	1	species		3	bc8	Acanthamoeba polyphaga moumouvirus	1	no rank		2	bc6	Aeromonas virus 65	1	species		2	bc7	Mycobacterium phage Bongo	1	no rank		2	bc7	Mycobacterium phage Bongo	1	no rank		2	bc7	Ateline alphaherpesvirus 1	1	species		2	bc6	Timquatrovirus
					1	bc4	Hubei mosquito virus 2	1	species		2	bc7	Cheoctovirus	1	genus		4	bc9	Proteus phage VB_PmiS-Isfahan	4	species		2	bc6	Krischvirus	1	genus		2	bc7	Acinetobacter phage YMC13/03/R2096	1	species		2	bc7	Acinetobacter phage YMC13/03/R2096	1	species		2	bc7	Human alphaherpesvirus 1	1	species		2	bc6	Acinetobacter phage YMC13/03/R2096
					1	bc4	Adoxophyes honmai entomopoxvirus 'L'	1	no rank		2	bc7	Mycobacterium phage CASbig	1	species		4	bc9	Escherichia phage JH2	1	no rank		2	bc6	Flaumdravirus	1	genus		2	bc7	Kochikohdavirus	1	genus		2	bc7	Kochikohdavirus	1	genus		2	bc7	Papiine alphaherpesvirus 2	1	species		2	bc6	Bubaline alphaherpesvirus 1
					1	bc4	Pandoravirus macleodensis	1	species		2	bc7	Smoothievirus	1	genus		5	bc10	Proteus phage VB_PmiS-Isfahan	111	species		2	bc6	Acinetobacter phage SH-Ab 15519	1	no rank		2	bc7	Paramecium bursaria Chlorella virus FR483	1	no rank		2	bc7	Paramecium bursaria Chlorella virus FR483	1	no rank		2	bc7	Enterobacteria phage T7	1	no rank		2	bc6	Cheoctovirus
					1	bc5	Timquatrovirus	7	genus		2	bc7	Ateline gammaherpesvirus 3	1	species		5	bc10	Colwellia phage 9A	1	no rank		2	bc6	Enterococcus phage ECP3	1	no rank		2	bc7	Phaeocystis globosa virus	1	species		2	bc7	Phaeocystis globosa virus	1	species		3	bc8	Bovine alphaherpesvirus 1	1779	species		2	bc6	Phicbkvirus
					1	bc5	Mannheimia phage vB_MhM_1127AP1	6	species		2	bc7	Spodoptera litura granulovirus	1	species		5	bc10	Staphylococcus phage 6ec	1	no rank		2	bc6	Streptococcus virus C1	1	species		2	bc7	Chrysochromulina ericina virus	1	species		2	bc7	Chrysochromulina ericina virus	1	species		3	bc8	Varicellovirus	78	genus		2	bc6	unclassified Fromanvirus
					1	bc5	Proteus phage VB_PmiS-Isfahan	4	species		2	bc7	Tokyovirus A1	1	species		5	bc10	Synechococcus phage S-CBWM1	1	species		2	bc6	Fowlpox virus	1	species		2	bc7	Invertebrate iridescent virus 3	1	species		2	bc7	Invertebrate iridescent virus 3	1	species		3	bc8	Bovine alphaherpesvirus 5	37	species		2	bc7	Alphaherpesvirinae
					1	bc5	unclassified Fromanvirus	1	no rank		2	bc7	Orf virus	1	species		5	bc10	Thermus phage phiYS40	1	species		2	bc7	Acinetobacter phage YMC13/03/R2096	142	species		2	bc7	Brazilian marseillevirus	1	species		2	bc7	Brazilian marseillevirus	1	species		3	bc8	Enterobacteria phage T7	3	no rank		3	bc7	Bovine alphaherpesvirus 1
					1	bc5	Smoothievirus	1	genus		2	bc7	Macaca mulatta polyomavirus 1	1	species		5	bc10	Aureococcus anophagefferens virus	1	species		2	bc7	Proteus phage VB_PmiS-Isfahan	6	species		2	bc7	Abaca bunchy top virus	1	species		2	bc7	Abaca bunchy top virus	1	species		3	bc8	unclassified T7-like viruses	3	no rank		3	bc7	Bovine alphaherpesvirus 5
					2	bc6	Proteus phage VB_PmiS-Isfahan	86	species		3	bc8	Proteus phage VB_PmiS-Isfahan	1	species		5	bc10	Orf virus	1	species		2	bc7	unclassified Siphoviridae	4	no rank		2	bc7	Leucas zeylanica yellow vein virus satellite DNA beta	1	species		2	bc7	Leucas zeylanica yellow vein virus satellite DNA beta	1	species		3	bc8	Phikmvvirus	2	genus		3	bc7	Bubaline alphaherpesvirus 1
					2	bc6	unclassified Peduovirus	18	no rank		4	bc9	Proteus phage VB_PmiS-Isfahan	9	species		5	bc10	Yokapox virus	1	species		2	bc7	Acanthamoeba polyphaga mimivirus	3	species		3	bc8	Proteus phage VB_PmiS-Isfahan	346	species		3	bc8	Proteus phage VB_PmiS-Isfahan	346	species		3	bc8	Escherichia phage D108	1	species		3	bc7	Equid alphaherpesvirus 3
					2	bc6	Mannheimia phage vB_MhM_587AP1	13	species		4	bc9	Clostridium phage phiCTP1	1	species		5	bc10	Acanthamoeba polyphaga moumouvirus	1	no rank		2	bc7	Lactobacillus phage SA-C12	2	species		3	bc8	Escherichia phage vB_EcoP_PhAPEC5	2	no rank		3	bc8	Escherichia phage vB_EcoP_PhAPEC5	2	no rank		3	bc8	Spring beauty latent virus	1	species		3	bc7	Proteus phage VB_PmiS-Isfahan
					2	bc6	Acinetobacter phage YMC13/03/R2096	13	species		4	bc9	Escherichia phage Mu	1	no rank		5	bc10	Beihai picorna-like virus 87	1	species		2	bc7	Corynebacterium phage Darwin	2	no rank		3	bc8	Saimiriine gammaherpesvirus 2	2	species		3	bc8	Saimiriine gammaherpesvirus 2	2	species		4	bc9	Bovine alphaherpesvirus 1	314	species		3	bc7	Simplexvirus
					2	bc6	Timquatrovirus	8	genus		4	bc9	Shigella phage SfMu	1	no rank		6	bc11	Proteus phage VB_PmiS-Isfahan	121	species		2	bc7	Colwellia phage 9A	2	no rank		3	bc8	Choristoneura rosaceana entomopoxvirus 'L'	2	no rank		3	bc8	Choristoneura rosaceana entomopoxvirus 'L'	2	no rank		4	bc9	Varicellovirus	16	genus		3	bc7	Streptococcus phage phiARI0468-4
					2	bc6	Bacillus virus G	4	species		4	bc9	Bovine gammaherpesvirus 4	1	species		6	bc11	Clostridium phage c-st	1	species		2	bc7	Aeromonas phage Aes012	2	no rank		3	bc8	Bacillus phage TP21-L	1	no rank		3	bc8	Bacillus phage TP21-L	1	no rank		4	bc9	Bovine alphaherpesvirus 5	10	species		3	bc7	Streptococcus phage phiNJ2
					2	bc6	Psychrobacter phage Psymv2	2	species		4	bc9	Lambdina fiscellaria nucleopolyhedrovirus	1	species		6	bc11	Lactococcus phage 1706	1	species		2	bc7	Flaumdravirus	2	genus		3	bc8	Achromobacter phage 83-24	1	no rank		3	bc8	Achromobacter phage 83-24	1	no rank		5	bc10	Bovine alphaherpesvirus 1	356	species		3	bc7	Varicellovirus
					2	bc6	Smoothievirus	2	genus		4	bc9	Lymphocystis disease virus - isolate China	1	species		6	bc11	Bacillus virus G	1	species		2	bc7	Staphylococcus virus Remus	2	species		3	bc8	Myoviridae	1	family		3	bc8	Myoviridae	1	family		5	bc10	Varicellovirus	40	genus		4	bc8	Bovine alphaherpesvirus 1
					2	bc6	Mannheimia phage vB_MhM_1127AP1	2	species		4	bc9	Betaretrovirus	1	genus		6	bc11	Phaeocystis globosa virus	1	species		2	bc7	Siphoviridae	1	family		3	bc8	Acinetobacter phage vB_AbaM_ME3	1	no rank		3	bc8	Acinetobacter phage vB_AbaM_ME3	1	no rank		5	bc10	Bovine alphaherpesvirus 5	6	species		4	bc8	Bovine alphaherpesvirus 5
					2	bc6	unclassified Fromanvirus	1	no rank		5	bc10	Proteus phage VB_PmiS-Isfahan	3	species		6	bc11	Emiliania huxleyi virus 86	1	species		2	bc7	Geobacillus phage GBK2	1	species		3	bc8	Pseudomonas phage VCM	1	no rank		3	bc8	Pseudomonas phage VCM	1	no rank		5	bc10	Enterobacteria phage T7	1	no rank		4	bc8	Proteus phage VB_PmiS-Isfahan
					2	bc6	Brevibacillus phage Jenst	1	no rank		6	bc11	Proteus phage VB_PmiS-Isfahan	5	species		6	bc11	Infectious spleen and kidney necrosis virus	1	species		2	bc7	Pseudoalteromonas phage H105/1	1	species		3	bc8	unclassified Teseptimavirus	1	no rank		3	bc8	unclassified Teseptimavirus	1	no rank		5	bc10	Phikmvvirus	1	genus		4	bc8	Varicellovirus
					2	bc6	Streptomyces phage Paradiddles	1	no rank		6	bc11	Adelie penguin polyomavirus	1	no rank		6	bc11	Golden Marseillevirus	1	species		2	bc7	Pseudomonas phage PS-1	1	species		3	bc8	Bacillus phage W.Ph.	1	no rank		3	bc8	Bacillus phage W.Ph.	1	no rank		6	bc11	Bovine alphaherpesvirus 1	1186	species		4	bc8	Bubaline alphaherpesvirus 1
					2	bc6	unclassified Myoviridae	1	no rank		PBS negative extraction control	bc12a	no virus detected				6	bc11	Orf virus	1	species		2	bc7	Fromanvirus	1	genus		3	bc8	Varicellovirus	1	genus		3	bc8	Varicellovirus	1	genus		6	bc11	Varicellovirus	51	genus		4	bc8	Prochlorococcus phage P-SSM4
					2	bc6	Prochlorococcus phage MED4-213	1	no rank								6	bc11	Yellowstone Lake virophage 6	1	species		2	bc7	Mycobacterium phage Jobu08	1	species		3	bc8	Bovine gammaherpesvirus 4	1	species		3	bc8	Bovine gammaherpesvirus 4	1	species		6	bc11	Bovine alphaherpesvirus 5	38	species		4	bc8	Timquatrovirus
					2	bc6	Acinetobacter phage AB1	1	no rank								6	bc11	St Croix River virus	1	species		2	bc7	Bacillus phage Mgbh1	1	no rank		3	bc8	Micromonas sp. RCC1109 virus MpV1	1	species		3	bc8	Micromonas sp. RCC1109 virus MpV1	1	species		6	bc11	Enterobacteria phage T7	7	no rank		4	bc8	Xanthomonas virus phil7
					2	bc6	Lactobacillus phage Lpa804	1	no rank								6	bc11	Pestivirus	1	genus		2	bc7	Phietavirus	1	genus		3	bc8	Adelie penguin polyomavirus	1	no rank		3	bc8	Adelie penguin polyomavirus	1	no rank		6	bc11	Suid alphaherpesvirus 1	1	species		5	bc1R	Bovine alphaherpesvirus 1
					2	bc6	Escherichia phage APCEc03	1	species								6	bc11	Pestivirus giraffe-1 H138	1	no rank		2	bc7	Bacillus phage PM1	1	species		3	bc8	Mouse mammary tumor virus	1	species		3	bc8	Mouse mammary tumor virus	1	species		6	bc11	T7virus	1	genus		5	bc1R	Proteus phage VB_PmiS-Isfahan
					2	bc6	Fort Sherman virus	1	no rank								6	bc11	Buzura suppressaria nucleopolyhedrovirus	1	species		2	bc7	Myoviridae	1	family		3	bc8	Rehmannia virus 1	1	species		3	bc8	Rehmannia virus 1	1	species		PBS negative extraction control	bc12a	Bovine alphaherpesvirus 1	1	species		5	bc1R	Varicellovirus
					2	bc6	African swine fever virus	1	species								6	bc11	Microplitis demolitor bracovirus	1	species		2	bc7	Cyanophage Syn30	1	species		3	bc8	Alfalfa virus F	1	species		3	bc8	Alfalfa virus F	1	species								5	bc9	Bovine alphaherpesvirus 1
					2	bc7	Proteus phage VB_PmiS-Isfahan	98	species								PBS negative extraction control	bc12a	no virus detected	no virus detected	no virus detected		2	bc7	Agricanvirus	1	genus		3	bc8	Rice tungro spherical virus	1	species		3	bc8	Rice tungro spherical virus	1	species								6	bc10	Bovine alphaherpesvirus 1
					2	bc7	Timquatrovirus	11	genus														2	bc7	Erwinia phage vB_EamM_Special G	1	no rank		3	bc8	Kallithea virus	1	species		3	bc8	Kallithea virus	1	species								6	bc10	Bovine alphaherpesvirus 5
					2	bc7	Acinetobacter phage YMC13/03/R2096	6	species														2	bc7	Pseudomonas phage PhiPA3	1	species		3	bc8	Chrysodeixis chalcites nucleopolyhedrovirus	1	species		3	bc8	Chrysodeixis chalcites nucleopolyhedrovirus	1	species								6	bc10	Proteus phage VB_PmiS-Isfahan
					2	bc7	Cheoctovirus	3	genus														2	bc7	Aeromonas phage CC2	1	species		3	bc8	Condylorrhiza vestigialis MNPV	1	species		3	bc8	Condylorrhiza vestigialis MNPV	1	species								6	bc10	Varicellovirus
					2	bc7	Lactobacillus phage Lpa804	2	no rank														2	bc7	Cronobacter phage vB_CsaM_GAP32	1	species		3	bc8	Glypta fumiferanae ichnovirus	1	species		3	bc8	Glypta fumiferanae ichnovirus	1	species								6	bc11	Bovine alphaherpesvirus 1
					2	bc7	Yokapox virus	2	species														2	bc7	Ithacavirus	1	genus		3	bc8	Pandoravirus macleodensis	1	species		3	bc8	Pandoravirus macleodensis	1	species								6	bc11	Bovine alphaherpesvirus 5
					2	bc7	unclassified Fromanvirus	1	no rank														2	bc7	Cronobacter phage vB_CsaP_GAP52	1	species		3	bc8	Pandoravirus salinus	1	species		3	bc8	Pandoravirus salinus	1	species								6	bc11	Proteus phage VB_PmiS-Isfahan
					2	bc7	Gordonia phage Nyceirae	1	no rank														3	bc8	Proteus phage VB_PmiS-Isfahan	98	species		4	bc9	Proteus phage VB_PmiS-Isfahan	547	species		4	bc9	Proteus phage VB_PmiS-Isfahan	547	species								6	bc11	Varicellovirus
					2	bc7	Acinetobacter phage IME-AB2	1	no rank														3	bc8	unclassified Peduovirus	79	no rank		4	bc9	Acinetobacter phage YMC13/03/R2096	5	species		4	bc9	Acinetobacter phage YMC13/03/R2096	5	species								6	bc11	Krischvirus
					2	bc7	Bacillus phage Troll	1	no rank														3	bc8	Mannheimia phage vB_MhM_587AP1	77	species		4	bc9	Psychrobacter phage Psymv2	4	species		4	bc9	Psychrobacter phage Psymv2	4	species								PBS negative extraction control	bc12a	Bovine alphaherpesvirus 1
					2	bc7	Bacillus virus SPO1	1	species														3	bc8	Mannheimia phage vB_MhM_1127AP1	49	species		4	bc9	Maenadvirus	1	genus		4	bc9	Maenadvirus	1	genus
					2	bc7	uncultured crAssphage	1	species														3	bc8	Acinetobacter phage YMC13/03/R2096	19	species		4	bc9	Brochothrix phage NF5	1	species		4	bc9	Brochothrix phage NF5	1	species
					2	bc7	Orf virus	1	species														3	bc8	Timquatrovirus	14	genus		4	bc9	Myoviridae	1	family		4	bc9	Myoviridae	1	family
					2	bc7	Acanthamoeba polyphaga mimivirus	1	species														3	bc8	Streptococcus phage PH10	4	species		4	bc9	Salmonella phage 1-23	1	no rank		4	bc9	Salmonella phage 1-23	1	no rank
					2	bc7	Choristoneura fumiferana granulovirus	1	species														3	bc8	unclassified Fromanvirus	3	no rank		4	bc9	Wiseana iridescent virus	1	no rank		4	bc9	Wiseana iridescent virus	1	no rank
					3	bc8	Proteus phage VB_PmiS-Isfahan	36	species														3	bc8	Cheoctovirus	2	genus		4	bc9	Adoxophyes honmai entomopoxvirus 'L'	1	no rank		4	bc9	Adoxophyes honmai entomopoxvirus 'L'	1	no rank
					3	bc8	Timquatrovirus	4	genus														3	bc8	Polaribacter phage P12002S	1	no rank		4	bc9	African swine fever virus	1	species		4	bc9	African swine fever virus	1	species
					3	bc8	Clavibacter phage CN1A	1	no rank														3	bc8	Phicbkvirus	1	genus		4	bc9	Mouse mammary tumor virus	1	species		4	bc9	Mouse mammary tumor virus	1	species
					3	bc8	Enterococcus phage vB_EfaS_AL3	1	no rank														3	bc8	Myoviridae	1	family		4	bc9	Pestivirus	1	genus		4	bc9	Pestivirus	1	genus
					3	bc8	unclassified Fromanvirus	1	no rank														3	bc8	Cyanophage Syn30	1	species		5	bc10	Proteus phage VB_PmiS-Isfahan	14	species		5	bc10	Proteus phage VB_PmiS-Isfahan	14	species
					3	bc8	Tevenvirinae	1	subfamily														3	bc8	Dickeya phage vB_DsoM_JA11	1	species		5	bc10	Fletchervirus	1	genus		5	bc10	Fletchervirus	1	genus
					3	bc8	Phaeocystis globosa virus	1	species														3	bc8	Psychrobacter phage pOW20-A	1	species		5	bc10	Orf virus	1	species		5	bc10	Orf virus	1	species
					3	bc8	Invertebrate iridescent virus 3	1	species														3	bc8	Pseudomonas phage PhiPA3	1	species		6	bc11	Proteus phage VB_PmiS-Isfahan	25	species		6	bc11	Proteus phage VB_PmiS-Isfahan	25	species
					3	bc8	Noumeavirus	1	species														3	bc8	Pseudomonas virus phiKZ	1	species		6	bc11	Campylobacter virus CP21	1	species		6	bc11	Campylobacter virus CP21	1	species
					4	bc9	Proteus phage VB_PmiS-Isfahan	1	species														3	bc8	Vibrio phage nt-1	1	no rank		6	bc11	Thysanoplusia orichalcea nucleopolyhedrovirus	1	species		6	bc11	Thysanoplusia orichalcea nucleopolyhedrovirus	1	species
					5	bc10	Proteus phage VB_PmiS-Isfahan	83	species														3	bc8	Lactobacillus phage Lpa804	1	no rank		PBS negative extraction control	bc12a	no virus detected	no virus detected	no virus detected		PBS negative extraction control	bc12	no virus detected	no virus detected	no virus detected
					5	bc10	Timquatrovirus	6	genus														3	bc8	Vibrio phage phi 3	1	no rank
					5	bc10	Cheoctovirus	3	genus														3	bc8	Acanthamoeba polyphaga moumouvirus	1	no rank
					5	bc10	Mycobacterium virus Heldan	1	species														3	bc8	Capripoxvirus	1	genus
					5	bc10	unclassified Fromanvirus	1	no rank														3	bc8	Paramecium bursaria Chlorella virus 1	1	species
					5	bc10	Prochlorococcus phage MED4-213	1	no rank														3	bc8	Common moorhen coronavirus HKU21	1	species
					5	bc10	Erwinia phage vB_EamP-S6	1	species														4	bc9	Proteus phage VB_PmiS-Isfahan	12	species
					5	bc10	Cyprinid herpesvirus 3	1	species														4	bc9	Mouse mammary tumor virus	1	species
					5	bc10	Meleagrid alphaherpesvirus 1	1	species														5	bc10	Mannheimia phage vB_MhM_587AP1	162	species
					5	bc10	Orthopoxvirus	1	genus														5	bc10	unclassified Peduovirus	127	no rank
					6	bc11	Proteus phage VB_PmiS-Isfahan	77	species														5	bc10	Mannheimia phage vB_MhM_1127AP1	83	species
					6	bc11	Timquatrovirus	17	genus														5	bc10	Proteus phage VB_PmiS-Isfahan	36	species
					6	bc11	Cheoctovirus	4	genus														5	bc10	Mannheimia phage vB_MhS_587AP2	1	species
					6	bc11	Bacillus virus G	4	species														5	bc10	Myoviridae	1	family
					6	bc11	Orf virus	3	species														5	bc10	Acinetobacter phage YMC13/03/R2096	1	species
					6	bc11	Streptococcus phage phiNJ2	1	species														6	bc11	no virus detected	no virus detected	no virus detected
					6	bc11	Phicbkvirus	1	genus														PBS negative extraction control	bc12a	no virus detected	no virus detected	no virus detected
					6	bc11	Staphylococcus virus 85	1	species
					6	bc11	Smoothievirus	1	genus
					6	bc11	Lactobacillus phage Lpa804	1	no rank
					PBS negative extraction control	bc12a	no virus detected
[truncated: 22 more columns]
