# Supplementary material for: Assessment of Rapid MinION Nanopore DNA Virus Meta-Genomics Using Calves Experimentally Infected with Bovine Herpes Virus-1
Source: Viruses. 2022 Aug 24;14(9):1859. doi: 10.3390/v14091859 (PMC9501177; doi:10.3390/v14091859)
Supplement: Supplementary file 1 [file viruses-14-01859-s001.zip › Table S5.xlsx]

## Sheet: Table S5
	Q10	Q10	Q10	Q10	Q10	Q10	Q7	Q7	Q7	Q7	Q7	Q7
Table S5. Comparison of Q7 and Q10 Fastq read-filtering on virus detection with Epi2ME Fastq WIMP.	Day	Barcode	Taxon	Read count	Rank	%	Day	Barcode	Taxon	Reads	Rank	%
	-1	1	no virus detected	no virus detected	no virus detected	no virus detected	-1	1	no virus detected	no virus detected	no virus detected	no virus detected
	0	2	Proteus phage VB_PmiS-Isfahan	1	no rank	100	0	2	Bovine alphaherpesvirus 1	1	species	50
	0	3	Proteus phage VB_PmiS-Isfahan	5	no rank	100	0	2	Pseudaletia unipuncta granulovirus	1	species	50
							0	3	Enterobacteria phage T7	1	no rank	50
							0	3	unclassified Myoviridae	1	no rank	50
	1	4	Bovine alphaherpesvirus 1	93	species	98.9362	1	4	Bovine alphaherpesvirus 1	795	species	92.7655
	1	4	Varicellovirus	sheet	genus	1.06383	1	4	Varicellovirus	33	genus	3.85064
							1	4	Bovine alphaherpesvirus 5	26	species	3.03384
							1	4	Cercopithecine alphaherpesvirus 2	1	species	0.116686
							1	4	Enterobacteria phage T7	1	no rank	0.116686
							1	4	Molluscum contagiosum virus subtype 1	1	no rank	0.116686
	1	5	Bovine alphaherpesvirus 1	55	species	94.8276	1	5	Bovine alphaherpesvirus 1	474	species	91.8605
	1	5	Varicellovirus	2	genus	3.44828	1	5	Varicellovirus	27	genus	5.23256
	1	5	Bovine alphaherpesvirus 5	1	species	1.72414	1	5	Bovine alphaherpesvirus 5	13	species	2.51938
							1	5	Alphaherpesvirinae	1	subfamily	0.193798
							1	5	Molluscum contagiosum virus subtype 1	1	no rank	0.193798
	2	6	Bovine alphaherpesvirus 1	1117	species	96.0447	2	6	Bovine alphaherpesvirus 1	12103	species	91.5853
	2	6	Varicellovirus	25	genus	2.14961	2	6	Varicellovirus	763	genus	5.77374
	2	6	Bovine alphaherpesvirus 5	19	species	1.63371	2	6	Bovine alphaherpesvirus 5	345	species	2.61067
	2	6	Bubaline alphaherpesvirus 1	2	species	0.171969	2	6	dsDNA viruses, no RNA stage	1	no rank	0.00756716
							2	6	Suid alphaherpesvirus 1	1	species	0.00756716
							2	6	Ateline alphaherpesvirus 1	1	species	0.00756716
							2	6	Macacine alphaherpesvirus 1	1	species	0.00756716
	2	7	Bovine alphaherpesvirus 1	13911	species	98.6526	2	7	Bovine alphaherpesvirus 1	77625	species	96.8569
	2	7	Bovine alphaherpesvirus 5	116	species	0.822637	2	7	Bovine alphaherpesvirus 5	1385	species	1.72814
	2	7	Varicellovirus	65	genus	0.46096	2	7	Varicellovirus	1125	genus	1.40372
	2	7	Bubaline alphaherpesvirus 1	8	species	0.0567336	2	7	Alphaherpesvirinae	3	subfamily	0.00374326
	2	7	Streptomyces phage WRightOn	1	species	0.0070917	2	7	Suid alphaherpesvirus 1	1	species	0.00124775
							2	7	Simplexvirus	1	genus	0.00124775
							2	7	Ateline alphaherpesvirus 1	1	species	0.00124775
							2	7	Human alphaherpesvirus 1	1	species	0.00124775
							2	7	Papiine alphaherpesvirus 2	1	species	0.00124775
							2	7	Enterobacteria phage T7	1	no rank	0.00124775
	3	8	Bovine alphaherpesvirus 1	226	species	96.5812	3	8	Bovine alphaherpesvirus 1	1779	species	93.4349
	3	8	Varicellovirus	3	genus	1.28205	3	8	Varicellovirus	78	genus	4.09664
	3	8	Bovine alphaherpesvirus 5	1	species	0.42735	3	8	Bovine alphaherpesvirus 5	37	species	1.94328
	3	8	Teetrevirus	1	genus	0.42735	3	8	Enterobacteria phage T7	3	no rank	0.157563
	3	8	Teseptimavirus	1	genus	0.42735	3	8	unclassified T7-like viruses	3	no rank	0.157563
	3	8	Escherichia phage T7	1	no rank	0.42735	3	8	Phikmvvirus	2	genus	0.105042
	3	8	Escherichia phage 500465-1	1	species	0.42735	3	8	Escherichia phage D108	1	species	0.052521
							3	8	Spring beauty latent virus	1	species	0.052521
	4	9	Bovine alphaherpesvirus 1	46	species	100	4	9	Bovine alphaherpesvirus 1	314	species	92.3529
							4	9	Varicellovirus	16	genus	4.70588
							4	9	Bovine alphaherpesvirus 5	10	species	2.94118
	5	10	Bovine alphaherpesvirus 1	17	species	94.4444	5	10	Bovine alphaherpesvirus 1	356	species	88.1188
	5	10	Escherichia phage Mu	1	no rank	5.55556	5	10	Varicellovirus	40	genus	9.90099
							5	10	Bovine alphaherpesvirus 5	6	species	1.48515
							5	10	Enterobacteria phage T7	1	no rank	0.247525
							5	10	Phikmvvirus	1	genus	0.247525
	6	11	Bovine alphaherpesvirus 1	166	species	95.9538	6	11	Bovine alphaherpesvirus 1	1186	species	92.3676
	6	11	Bovine alphaherpesvirus 5	3	species	1.7341	6	11	Varicellovirus	51	genus	3.97196
	6	11	Varicellovirus	1	genus	0.578035	6	11	Bovine alphaherpesvirus 5	38	species	2.9595
	6	11	Bubaline alphaherpesvirus 1	1	species	0.578035	6	11	Enterobacteria phage T7	7	no rank	0.545171
	6	11	Escherichia phage Mu	1	no rank	0.578035	6	11	Suid alphaherpesvirus 1	1	species	0.0778816
	6	11	Teetrevirus	1	genus	0.578035	6	11	T7virus	1	genus	0.0778816
	PBS negative extraction control	12a	no virus detected	no virus detected	no virus detected	no virus detected	PBS negative extraction control	12a	Bovine alphaherpesvirus 1	1	species	100
	all days	all barcodes	Bovine alphaherpesvirus 1	15631	species	98.3577	all days	all barcodes	Bovine alphaherpesvirus 1	92149	species	95.7691
	all days	all barcodes	Bovine alphaherpesvirus 5	140	species	0.880946	all days	all barcodes	Varicellovirus	2489	genus	2.58678
	all days	all barcodes	Varicellovirus	97	genus	0.61037	all days	all barcodes	Bovine alphaherpesvirus 5	1370	species	1.42382
	all days	all barcodes	Bubaline alphaherpesvirus 1	11	species	0.0692172	all days	all barcodes	Bubaline alphaherpesvirus 1	174	species	0.180836
	all days	all barcodes	Proteus phage VB_PmiS-Isfahan	6	no rank	0.0377548	all days	all barcodes	Proteus phage VB_PmiS-Isfahan	10	no rank	0.0103928
	all days	all barcodes	Teetrevirus	2	genus	0.0125849	all days	all barcodes	Suid alphaherpesvirus 1	5	species	0.00519642
	all days	all barcodes	Escherichia phage Mu	2	no rank	0.0125849	all days	all barcodes	Escherichia phage Mu	5	no rank	0.00519642
	all days	all barcodes	Teseptimavirus	1	genus	0.00629247	all days	all barcodes	Teetrevirus	4	genus	0.00415714
	all days	all barcodes	Escherichia phage T7	1	no rank	0.00629247	all days	all barcodes	Alphaherpesvirinae	2	subfamily	0.00207857
	all days	all barcodes	Escherichia phage 500465-1	1	species	0.00629247	all days	all barcodes	Simplexvirus	2	genus	0.00207857
							all days	all barcodes	Macacine alphaherpesvirus 1	2	species	0.00207857
							all days	all barcodes	Papiine alphaherpesvirus 2	1	species	0.00103928
							all days	all barcodes	Teseptimavirus	1	genus	0.00103928
							all days	all barcodes	Escherichia phage T7	1	no rank	0.00103928
							all days	all barcodes	Shigella phage SfMu	1	no rank	0.00103928
							all days	all barcodes	Escherichia phage D108	1	species	0.00103928
							all days	all barcodes	Escherichia phage 500465-1	1	species	0.00103928
							all days	all barcodes	Streptomyces phage WRightOn	1	species	0.00103928
							all days	all barcodes	Stenotrophomonas phage S1	1	species	0.00103928
