# Supplementary material for: Assessment of Rapid MinION Nanopore DNA Virus Meta-Genomics Using Calves Experimentally Infected with Bovine Herpes Virus-1
Source: Viruses. 2022 Aug 24;14(9):1859. doi: 10.3390/v14091859 (PMC9501177; doi:10.3390/v14091859)
Supplement: Supplementary file 1 [file viruses-14-01859-s001.zip › Table S6.xlsx]

## Sheet: Table S6
Table S6. Comparison taxa detected in the same FASTQ files by STAT and Epi2ME Fastq WIMP analysis.	STAT	STAT	STAT	STAT	STAT		STAT	STAT	STAT	STAT	STAT	STAT	STAT	STAT		Epi2ME	Epi2ME	Epi2ME	Epi2ME	Epi2ME	Epi2ME	Epi2ME	Epi2ME
	animal	day	barcode	taxa	% reads		animal	day	barcode	SuperKingdom	Organism	Rank	% sequence	Kbp		animal	day	barcode	kingdom	taxon	read count	rank	% reads
	BoHV1_3	2	bc7	Unidentified reads	5.33		BoHV1_3	2	bc7	Eukaryota	Bos taurus	species	45	116128		BoHV1_3	2	bc7	unclassified	unclassified	26891	unclassified	26.0002
	BoHV1_3	2	bc7	Identified reads	94.67		BoHV1_3	2	bc7	Bacteria	Moraxella bovoculi	species	40.9	105675		BoHV1_3	2	bc7	bacteria	Moraxella bovoculi	40954	species	39.5974
	BoHV1_3	2	bc7	Viruses	2.05		BoHV1_3	2	bc7	Eukaryota	Bos indicus x Bos taurus	species	3.1	8004		BoHV1_3	2	bc7	eukaryotes	Homo sapiens	17066	species	16.5007
	BoHV1_3	2	bc7	Varicellovirus	2		BoHV1_3	2	bc7	Viruses	Bovine alphaherpesvirus 1	species	2.1	5294		BoHV1_3	2	bc7	bacteria	Clostridium botulinum	13714	species	13.2597
	BoHV1_3	2	bc7	Bovine alphaherpesvirus 1	1.87		BoHV1_3	2	bc7	Eukaryota	Homininae	subfamily	1.5	3941		BoHV1_3	2	bc7	virus	Bovine alphaherpesvirus 1	2386	species	2.30696
	BoHV1_3	2	bc7	Bovine herpesvirus type 1.2	0.01		BoHV1_3	2	bc7	Eukaryota	Bos mutus	species	1.4	3641		BoHV1_3	2	bc7	bacteria	Mannheimia varigena USDA-ARS-USMARC-1388	488	strain	0.471835
	BoHV1_3	2	bc7	Bovine herpesvirus type 1.2 strain K22	0.01		BoHV1_3	2	bc7	Eukaryota	Bison	genus	1.4	3496		BoHV1_3	2	bc7	bacteria	Mycoplasma dispar	402	species	0.388684
	BoHV1_3	2	bc7	Bovine herpesvirus type 1.2 strain B589	< 0.01		BoHV1_3	2	bc7	Eukaryota	Bos indicus	species	1.2	2989		BoHV1_3	2	bc7	bacteria	Mannheimia sp. USDA-ARS-USMARC-1261	392	species	0.379015
	BoHV1_3	2	bc7	Bovine alphaherpesvirus 5	< 0.01		BoHV1_3	2	bc7	Eukaryota	Bubalus	genus	0.8	2174		BoHV1_3	2	bc7	virus	Proteus phage VB_PmiS-Isfahan	289	no rank	0.279427
	BoHV1_3	2	bc7	cellular organisms	92.61											BoHV1_3	2	bc7	bacteria	Moraxella	264	genus	0.255255
	BoHV1_3	2	bc7	Eukaryota	46.56											BoHV1_3	2	bc7	bacteria	Moraxella ovis	206	species	0.199176
	BoHV1_3	2	bc7	Boreoeutheria	46.29											BoHV1_3	2	bc7	bacteria	Acinetobacter	93	genus	0.0899194
	BoHV1_3	2	bc7	Laurasiatheria	44.52											BoHV1_3	2	bc7	bacteria	Acinetobacter sp. NEB149	85	species	0.0821844
	BoHV1_3	2	bc7	Bovidae	42.35											BoHV1_3	2	bc7	bacteria	unclassified Psychrobacter	80	no rank	0.07735
	BoHV1_3	2	bc7	Bovinae	37.13											BoHV1_3	2	bc7	virus	Varicellovirus	62	genus	0.0599462
	BoHV1_3	2	bc7	Bos	25.02											BoHV1_3	2	bc7	virus	Bovine alphaherpesvirus 5	31	species	0.0299731
	BoHV1_3	2	bc7	Bos taurus	10.63											BoHV1_3	2	bc7	virus	Bubaline alphaherpesvirus 1	8	species	0.007735
	BoHV1_3	2	bc7	Euarchontoglires	1.44											BoHV1_3	2	bc7	eukaryotes	Botrytis cinerea B05.10	4	strain	0.0038675
	BoHV1_3	2	bc7	Catarrhini	1.39											BoHV1_3	2	bc7	eukaryotes	Candida dubliniensis CD36	4	strain	0.0038675
	BoHV1_3	2	bc7	Homininae	1.1											BoHV1_3	2	bc7	eukaryotes	Opisthokonta	2	clade	0.00193375
	BoHV1_3	2	bc7	Homo sapiens	0.7											BoHV1_3	2	bc7	virus	Bacillus phage AvesoBmore	1	no rank	0.000966875
	BoHV1_3	2	bc7	Bacteria	41.03											BoHV1_3	2	bc7	virus	Flamingopox virus FGPVKD09	1	species	0.000966875
	BoHV1_3	2	bc7	Proteobacteria	40.47											BoHV1_3	2	bc7	archaea	Methanobacterium subterraneum	1	species	0.000966875
	BoHV1_3	2	bc7	Gammaproteobacteria	40.42											BoHV1_3	2	bc7	archaea	Methanosphaera stadtmanae	1	species	0.000966875
	BoHV1_3	2	bc7	Pseudomonadales	39.37											BoHV1_3	2	bc7	archaea	Thermococcus sibiricus MM 739	1	strain	0.000966875
	BoHV1_3	2	bc7	Moraxellaceae	39.37
	BoHV1_3	2	bc7	Moraxella	38.48
	BoHV1_3	2	bc7	Moraxella bovoculi	33.62
	BoHV1_3	2	bc7	Moraxella bovoculi 237	0.08
	BoHV1_3	2	bc7	Moraxella ovis	0.07
	BoHV1_3	2	bc7	Moraxella catarrhalis	0.01
	BoHV1_3	2	bc7	Moraxella osloensis	0.01
	BoHV1_3	2	bc7	Moraxella caviae	0.01
	BoHV1_3	2	bc7	Moraxella bovis	0.01
	BoHV1_3	2	bc7	Moraxella nonliquefaciens	< 0.01
	BoHV1_3	2	bc7	Moraxella lacunata	< 0.01
	BoHV1_3	2	bc7	Moraxella canis	< 0.01
	BoHV1_3	2	bc7	Psychrobacter	0.51
	BoHV1_3	2	bc7	Psychrobacter pasteurii	0.28
	BoHV1_3	2	bc7	Psychrobacter immobilis	0.02
	BoHV1_3	2	bc7	unclassified Psychrobacter	0.02
	BoHV1_3	2	bc7	Psychrobacter phenylpyruvicus	< 0.01
	BoHV1_3	2	bc7	Acinetobacter	0.29
	BoHV1_3	2	bc7	unclassified Acinetobacter	0.09
	BoHV1_3	2	bc7	Acinetobacter sp. YH12106	0.01
	BoHV1_3	2	bc7	Acinetobacter indicus	< 0.01
	BoHV1_3	2	bc7	Acinetobacter schindleri	< 0.01
	BoHV1_3	2	bc7	Pasteurellales	0.95
	BoHV1_3	2	bc7	Mannheimia	0.93
	BoHV1_3	2	bc7	Mannheimia varigena	0.53
	BoHV1_3	2	bc7	Mannheimia varigena USDA-ARS-USMARC-1388	0.23
	BoHV1_3	2	bc7	unclassified Mannheimia	0.13
	BoHV1_3	2	bc7	Mannheimia sp. USDA-ARS-USMARC-1261	0.13
	BoHV1_3	2	bc7	Mannheimia bovis	0.02
	BoHV1_3	2	bc7	Enterobacterales	0.01
	BoHV1_3	2	bc7	Escherichia coli	0.01
	BoHV1_3	2	bc7	Alphaproteobacteria	0.01
	BoHV1_3	2	bc7	Sphingomonadales	0.01
	BoHV1_3	2	bc7	Sphingomonas	0.01
	BoHV1_3	2	bc7	Rickettsiales	< 0.01
	BoHV1_3	2	bc7	Anaplasma phagocytophilum	< 0.01
	BoHV1_3	2	bc7	Terrabacteria group	0.45
	BoHV1_3	2	bc7	Tenericutes	0.36
	BoHV1_3	2	bc7	Mycoplasma dispar	0.36
	BoHV1_3	2	bc7	Firmicutes	0.07
	BoHV1_3	2	bc7	Bacilli	0.05
	BoHV1_3	2	bc7	Lactobacillales	0.04
	BoHV1_3	2	bc7	Streptococcaceae	0.04
	BoHV1_3	2	bc7	Streptococcus	0.04
	BoHV1_3	2	bc7	Carnobacteriaceae	< 0.01
	BoHV1_3	2	bc7	Jeotgalibaca porci	< 0.01
	BoHV1_3	2	bc7	Bacillales	0.01
	BoHV1_3	2	bc7	Staphylococcus aureus	0.01
	BoHV1_3	2	bc7	Clostridia	0.03
	BoHV1_3	2	bc7	Eubacteriales	0.03
	BoHV1_3	2	bc7	Peptostreptococcaceae	0.01
	BoHV1_3	2	bc7	Lachnospiraceae	< 0.01
	BoHV1_3	2	bc7	Actinobacteria	< 0.01
	BoHV1_3	2	bc7	Actinomycetia	< 0.01
	BoHV1_3	2	bc7	Corynebacteriales	< 0.01
	BoHV1_3	2	bc7	Mycobacterium tuberculosis variant bovis	< 0.01
	BoHV1_3	2	bc7	Micrococcales	< 0.01
	BoHV1_3	2	bc7	Promicromonosporaceae	< 0.01
	BoHV1_3	2	bc7	FCB group	< 0.01
	BoHV1_3	2	bc7	Flavobacteriales	< 0.01
