# Supplementary material for: Assessment of Rapid MinION Nanopore DNA Virus Meta-Genomics Using Calves Experimentally Infected with Bovine Herpes Virus-1
Source: Viruses. 2022 Aug 24;14(9):1859. doi: 10.3390/v14091859 (PMC9501177; doi:10.3390/v14091859)
Supplement: Supplementary file 1 [file viruses-14-01859-s001.zip › Table S7.xlsx]

## Sheet: Table S7
	filename	readid	runid	taxID	name	score	lineage	sequence
Table S7. Five randomly selected sequences assigned by Epi2ME Fastq WIMP to Proteus phage VB_PmiS-Isfahan taxa.	FAL14189_854ba7e7518a8921a061f33f317cefa3fae4c51f_170-0081-0077.fastq	d44a4303-6be9-49c6-b080-e132e05ecbb4	854ba7e7518a8921a061f33f317cefa3fae4c51f	1969841	Proteus phage VB_PmiS-Isfahan	340	1:10239:2731341:2731360:2731618:2731619:28883:10699:2560142:2560650:1969841	>1CACCGGGCTCTGCCACCTTAACTAAGCCCTGTTCACAGGGGCAGGGTTTGTGTTGTCAGTTGAGATGTTATCATTGGTTGTCTTAAGGCGCTTGATTTAAAGTTGGCCTTATTTCTCTTGTCCTTTCGTACTGGGAGAAATACGTAATGGAAGAAACCGACCTGGTTACTCCGGTCTGAACTCCAGATCACGTAGGACTTTAATCGTTGAACGGAACGAACCTTTGATAGCAGTTTGCACCATCAGGATGTCTGATCAACATCGAGGTCGTAAACCCTATTGTCGATATGGGCTCTTGAATAGGATTGCTGGTAATAAAGTAACTTGTTCCGTTGATCAAGTTTTGGATCAATGAGCGATAGAGTGATTTGACTTGTGGGTCCTAGTCTTTAAAATC…
	FAL14189_854ba7e7518a8921a061f33f317cefa3fae4c51f_255-0175-0174.fastq	86a28e12-07d2-4adb-8dea-9e294b683440	854ba7e7518a8921a061f33f317cefa3fae4c51f	1969841	Proteus phage VB_PmiS-Isfahan	1225	1:10239:2731341:2731360:2731618:2731619:28883:10699:2560142:2560650:1969841	>2CAACGGGGCTCTGCCACCTTAACTAAGCTGTTTACAGGGCGGGGTTTGTGTTGTCAGTTGAGATGTTATCATTGGGTTGTCTTAAGGCGCTTGATTTAAAGTTGGCCTTATTTCTCTTGTCGCTTTCGTACTGGAAATACGTAATAGATAAACCGTGGATTACTCCGGTCTGAACTCAGATCACGTAGGACTTTAATCGTTGAACGAACGAACCTTTGATAGCGGTTTGCACCATCAGGATGTCCTGATCCAACATCGAGGTCGTAAACCCTGTGTGTCGATATGGACTCTTGAATAGGGTTGCGCTGTTATCCCCTGGGGTAACTGTTCCGTTGATCAGGATTTTTGGATCAATGAGCGATAGAGTGATTTGACTTGTGGGTCTAGTCTTTAAAAT…
	FAL14189_854ba7e7518a8921a061f33f317cefa3fae4c51f_245-0162-0162.fastq	89e674e3-4259-48b8-9149-fdc6d8ff573b	854ba7e7518a8921a061f33f317cefa3fae4c51f	1969841	Proteus phage VB_PmiS-Isfahan	850	1:10239:2731341:2731360:2731618:2731619:28883:10699:2560142:2560650:1969841	>3CATCATTCATTATGAATATCTTGAACTAGACCTGGCCAAAGATACCCTCTCGACTAAACAACCAAGATAGAATAAAACAAAACATTTAATCCCAATTTAAGTATAGGAGATAGAAATCTAAGTACGGCGCTATAGAGAAAGTACCGCAAGGGAACGATGAAAGAAAAAAACTAAAAGTATAAAAGCAAAGATTACCCCTTGTACCTTTTATACTTAATGAATTAACTAGTATAAAACTCAAAATGAATTTTAACTAAACAGCCCGAAACCAGACAGGCTACTCACAAACAGATTTACCAGAACTAACTCATCTATGTGGCAAAAATGGTAGAGAAGATTTGTAAGTAGAGGTGACATGCCTAACGAGCCTGGTGATAGCTGGTTGTCAGAAAATGAA…
	FAL14189_854ba7e7518a8921a061f33f317cefa3fae4c51f_230-0147-0149.fastq	3f64111c-3d3a-4577-818a-11c52c763e61	854ba7e7518a8921a061f33f317cefa3fae4c51f	1969841	Proteus phage VB_PmiS-Isfahan	625	1:10239:2731341:2731360:2731618:2731619:28883:10699:2560142:2560650:1969841	>4CTGGATTTAATTCGCTAGCGTTACTTCAGTATGAGATTGTTTGTGCTGCACTCGTGTGAGACTCCAGTTGATACATGTTTTGAGTTGGAGCTCATTTGATCAGAGAATGGAGTATGCGGCTGACAGTGTATTTAGTATAAATGGACTCCTAGGTTTATGTTTAGGCGTAAAGAGGATAAAACAGAGGTATTGGTAGGGGAATTCACATAGTTAAGGCTATGGCCTGGCTATGATAGTGCTAGGATAATATATTGAGGTTGCGAAGATGCTGCAGGTCGTAGATGGTTCTTCAATGGCAGTTTGATTATCGGCGATGGGTTAGTAATTATATGGTTGTTTCATTTGGACCTTTTCGGAGTTGTATACAACCTAGAACTTTTCGTTCCACTAATGAGAA…
	FAL14189_854ba7e7518a8921a061f33f317cefa3fae4c51f_89-0427-0427.fastq	e22d03b3-ee2a-49ea-adfd-3736aac69974	854ba7e7518a8921a061f33f317cefa3fae4c51f	1969841	Proteus phage VB_PmiS-Isfahan	869	1:10239:2731341:2731360:2731618:2731619:28883:10699:2560142:2560650:1969841	>5CAACTGCTGTTATTCAGCCTATATGAGCGATTGATGAGTAGGCTATGATTTTCAGGTTGTGTTTGGTTTAGTCCCCCCTCAGCCTCCAATTAGGATTGATAAAACTGATAGAGGTTAAATTAAGTTTAGGTTAATTGATGGGAAGATTTGGTAAAAGTACAGATATAGGTGCTAGTTTTGTCATGTCAGTAGGATAAGGCCTGAGGATAGGGGATGCCCTGTGTTACTTCTGGGACTCAGAAGTGAAATGGGAGCTATTCTAGTTTTATAGCTAGGGCTATCGTTATAAGTATTGAGGCTATTGGGTTAAAATAGTTTTATTACGGTTCATTGGCCTGAGAATATTAGGTTAATATTAATGGCTAGTATTAGTAGTATTGAGGCTGTTGATTGAGGT…
