# Supplementary material for: Assessment of Rapid MinION Nanopore DNA Virus Meta-Genomics Using Calves Experimentally Infected with Bovine Herpes Virus-1
Source: Viruses. 2022 Aug 24;14(9):1859. doi: 10.3390/v14091859 (PMC9501177; doi:10.3390/v14091859)
Supplement: Supplementary file 1 [file viruses-14-01859-s001.zip › Table S8.xlsx]

## Sheet: Table S8
Table S8. Comparison of Epi2ME Fastq WIMP analysis of same Fastq files (all barcodes from calf BoHV1_1) in Febraury 2020 and March 2022 showing incorrect identification of Clostridium botulinum in March 2022.	EPI2ME Fastq WIMP analysis (13th Feb 2020, 1:57 PM)			EPI2ME Fastq WIMP analysis (23rd March 2022, 2:56 PM)
	taxa	reads		taxa	reads
	Bovine alphaherpesvirus 1	96765		Clostridium botulinum	199327
	Homo sapiens	12857		Bovine alphaherpesvirus 1	94132
	Escherichia coli	5847		Homo sapiens	11692
	Bovine alphaherpesvirus 5	1908		Escherichia coli	7043
	Methylobacterium aquaticum	888		Bovine alphaherpesvirus 5	1408
	Moraxella bovoculi	353		Klebsiella pneumoniae	334
	Klebsiella pneumoniae	303		Moraxella bovoculi	319
	Cutibacterium acnes	233		Cutibacterium acnes	236
	Pasteurella multocida	213		Pasteurella multocida	203
	Lobosporangium transversale	96		Bubaline alphaherpesvirus 1	178
	Shigella flexneri	73		Escherichia fergusonii	178
	Escherichia albertii	62		Shigella dysenteriae	145
